# Supplementary material
Source: PubMed Central journal article supplement (PMC9411913)
Supplement: bjophthalmol-2020-318618supp001.pdf [file bjophthalmol-2020-318618supp001.pdf]

**Content of Supplement:**

eTable 1: Microbiologic results

**eTable 1: Microbiologic results**

| Patients                 | #1                   | #2                    | #3                   | #4                   | #5                   | #6                   | #7                   | #8                   | #9                   | #10                  | #11                  | #12                  | #13                  | #14                  |
|--------------------------|----------------------|-----------------------|----------------------|----------------------|----------------------|----------------------|----------------------|----------------------|----------------------|----------------------|----------------------|----------------------|----------------------|----------------------|
| <b>Retina</b>            |                      |                       |                      |                      |                      |                      |                      |                      |                      |                      |                      |                      |                      |                      |
| Copies / B-Globin gene   | 1.458                | 0.060                 | 0.003                | 0.003                | 0.003                | 0.001                | 0.001                | 0                    | 0                    | 0                    | 0                    | 0                    | 0                    | 0                    |
| Copies / ml              | 1.06x10 <sup>7</sup> | 1.40x10 <sup>3</sup>  | 9.92x10 <sup>2</sup> | 4.02x10 <sup>3</sup> | 9.12x10 <sup>3</sup> | 1.68x10 <sup>3</sup> | 7.47x10 <sup>2</sup> | <LOD                 |
| Delta CT (N1-sgRNA)      | -2.7                 | -                     | -2.9                 | nd                   | nd                   | nd                   | -                    | nd                   |
| 2 <sup>Δ</sup> -delta ct | 0.15                 | -                     | 0.13                 | na                   | na                   | na                   | -                    | na                   |
| virus cultivation        | neg                  | neg                   | neg                  | neg                  | neg                  | neg                  | neg                  | neg                  | neg                  | neg                  | neg                  | neg                  | neg                  | neg                  |
| <b>Optic Nerve</b>       |                      |                       |                      |                      |                      |                      |                      |                      |                      |                      |                      |                      |                      |                      |
| Copies / B-Globin gene   | 1.157                | -                     | 0.088                | 0.141                | 0.644                | 11.160               | 3717.074             | 0.003                | 0.009                | 1796.236             | 0                    | 0.005                | 0                    | 0                    |
| Copies / ml              | 4.72x10 <sup>5</sup> | -                     | 1.00x10 <sup>2</sup> | 5.99x10 <sup>2</sup> | 3.70x10 <sup>3</sup> | 1.50x10 <sup>7</sup> | 1.07x10 <sup>6</sup> | 4.05x10 <sup>5</sup> | 5.64x10 <sup>3</sup> | 9.05x10 <sup>2</sup> | <LOD                 | 1.07x10 <sup>3</sup> | <LOD                 | <LOD                 |
| Delta CT (N1-sgRNA)      | -4.7                 | -                     | -1.7                 | -5                   | nd                   | -6.50                | nd                   | nd                   | -2.8                 | nd                   | nd                   | nd                   | nd                   | -5.7                 |
| 2 <sup>Δ</sup> -delta ct | 0.04                 | -                     | 0.31                 | 0.03                 | na                   | 0.01                 | na                   | na                   | 0.14                 | na                   | na                   | na                   | na                   | 0.02                 |
| virus cultivation        | neg                  | -                     | neg                  |
| <b>Vitreous humor</b>    |                      |                       |                      |                      |                      |                      |                      |                      |                      |                      |                      |                      |                      |                      |
| Copies / B-Globin gene   | 0.336                | 52.306                | 0                    | 2.368                | 0                    | 0.342                | -                    | 0                    | 0                    | 0.015                | 0.396                | 0                    | 0                    | 0.099                |
| Copies / ml              | 1.20x10 <sup>6</sup> | 9.62x10 <sup>5</sup>  | <LOD                 | 2.77x10 <sup>7</sup> | <LOD                 | 8.26x10 <sup>3</sup> | 2.96x10 <sup>3</sup> | <LOD                 | <LOD                 | 3.15x10 <sup>3</sup> | 2.72x10 <sup>3</sup> | <LOD                 | <LOD                 | 2.32x10 <sup>3</sup> |
| Delta CT (N1-sgRNA)      | -3.1                 | -                     | nd                   | nd                   | nd                   | nd                   | -                    | nd                   | nd                   | -                    | nd                   | nd                   | nd                   | nd                   |
| 2 <sup>Δ</sup> -delta ct | 0.12                 | -                     | na                   | na                   | na                   | na                   | -                    | na                   | na                   | -                    | na                   | na                   | na                   | na                   |
| virus cultivation        | neg                  | neg                   | neg                  | neg                  | neg                  | neg                  | neg                  | neg                  | neg                  | neg                  | neg                  | neg                  | neg                  | neg                  |
| <b>Blood</b>             |                      |                       |                      |                      |                      |                      |                      |                      |                      |                      |                      |                      |                      |                      |
| Copies / B-Globin gene   | 3.782                | -                     | 0.001                | 0                    | -                    | -                    | 5042.467             | 0                    | 3.782                | -                    | 0                    | 0                    | 0.005                | 0                    |
| Copies / ml              | 7.53x10 <sup>5</sup> | 1.00x10 <sup>6</sup>  | 4.95x10 <sup>3</sup> | <LOD                 | -                    | -                    | 2.68x10 <sup>7</sup> | <LOD                 | 1.72x10 <sup>4</sup> | -                    | <LOD                 | <LOD                 | 1.35x10 <sup>4</sup> | <LOD                 |
| <b>Swab throat</b>       |                      |                       |                      |                      |                      |                      |                      |                      |                      |                      |                      |                      |                      |                      |
| Copies / ml              | 1.14x10 <sup>4</sup> | 1.02x10 <sup>10</sup> | 1.29x10 <sup>5</sup> | <LOD                 | <LOD                 | 4.91x10 <sup>7</sup> | 2.18x10 <sup>6</sup> | <LOD                 | 9.62x10 <sup>6</sup> | 1.48x10 <sup>3</sup> | 1.76x10 <sup>3</sup> | 6.77x10 <sup>5</sup> | 1.95x10 <sup>4</sup> | 1.09x10 <sup>4</sup> |

eTable 1 provides detailed microbiologic results for each patient (#1-#14). Abbreviations:

<LOD: below level of detection; neg: negative; nd: not detected; na: not applicable. The

hyphen represents missing values.
